# Supplementary material for: Loss of NFE2L3 protects against inflammation-induced colorectal cancer through modulation of the tumor microenvironment
Source: PubMed Central journal article supplement (PMC8913363; doi:10.1038/s41388-022-02192-2), 2022-01-28
Supplement: 41388_2022_2192_MOESM3_ESM.pdf [file 41388_2022_2192_MOESM3_ESM.pdf]

## Table S2

### a) Primers for RT-qPCR

| Mus Musculus gene name | Forward and reverse primer sequence    |
|------------------------|----------------------------------------|
| Eef2                   | Fwd: 5'-TGTCAGTCATCGCCCATGTG-3'        |
|                        | Rev: 5'-CATCCTTGCAGGTGTCAGTGA-3'       |
| Il33                   | Purchased from Biorad (qMmuCID0012110) |
| Myrip                  | Fwd: 5'- AGCCCTGTCTTCACTTCCAAG-3'      |
|                        | Rev: 5'- AGCAGCAATGGCAAACAAGG-3'       |
| Nfe2l3                 | Fwd: 5'-ACAGCCTGAACATTCTCTGGA-3'       |
|                        | Rev: 5'-TGGCTTATAGCTTGGCTCAA-3'        |
| Nono                   | Fwd: 5'-AAAGCAGGCGAAGTTTTTCATTC-3'     |
|                        | Rev: 5'-ATTTCCGCTAGGGTTCGTGTT-3'       |
| Rab27a                 | Fwd: 5'-TTTCGGAGCTTAACCACTGC-3'        |
|                        | Rev: 5'-TTTCACAGTACGCGTGCATC-3'        |
| Rab27b                 | Fwd: 5'- AGTCAACTGCAGGCAAATGC-3'       |
|                        | Rev: 5'- TTGCCGTTCACTGACTTCCC-3'       |
| Rplp0                  | Fwd: 5'-AGATTCGGGATATGCTGTTGGC-3'      |
|                        | Rev: 5'-TCGGGTCTAGACCAGTGTTCC-3'       |
| Tbp                    | Fwd: 5'-CCAATGACTCCTATGACCCCTA-3'      |
|                        | Rev: 5'-CAGCCAAGATTCACGGTAGAT-3'       |
| Sytl2                  | Purchased from Biorad (qMmuCED0047428) |
| Sytl4                  | Fwd: 5'- TGGAGCTAGAGACCCTTCCA-3'       |
|                        | Rev: 5'- TCAAATCCCTTTCATCTCG-3'        |

### b) Primers for ChIP-qPCR

| Homo sapiens gene name | Forward and reverse primer sequence            |
|------------------------|------------------------------------------------|
| Il33 peak A            | Fwd: 5'-CTTGCATCTACCCTGAAAGGAG-3'              |
|                        | Rev: 5'-TGGTTACCCAGGTTTTGTG-3'                 |
| Il33 peak B            | Fwd: 5'-TGGGCACACTGATATTGCTG-3'                |
|                        | Rev: 5'-AGGGGAAAGGAGACACAAAC-3'                |
| Rab27a peak A          | Fwd: 5'- ATCCCTCGCTTGTGTATGG-3'                |
|                        | Rev: 5'- TAACTTTCCTGGCCATCTGC-3'               |
| Rab27a peak B          | Fwd: 5'-GGTAGTGAACCTGGGACTGC-3'                |
|                        | Rev: 5'-ACTGAGAGGGATGAACTTGGCC-3'              |
| Rab27b peak A          | Fwd: 5'- ATACCTGCCTGAGTTTCCACAG-3'             |
|                        | Rev: 5'- AAAGCTCTCACTGTGCCAAC-3'               |
| Rab27b peak B          | Fwd: 5'- TTGGCCAAACTCAGTACTG-3'                |
|                        | Rev: 5'- AGTTCAGCCTAAAGGTTTCTCTG-3'            |
| RPL30                  | Purchased from Cell signaling technology       |
|                        | (SimpleChIP® Human RPL30 Exon 3 Primers #7014) |
