# Supplementary material for: Loss of NFE2L3 protects against inflammation-induced colorectal cancer through modulation of the tumor microenvironment
Source: PubMed Central journal article supplement (PMC8913363; doi:10.1038/s41388-022-02192-2), 2022-01-28

# Supp. Figure 1

a

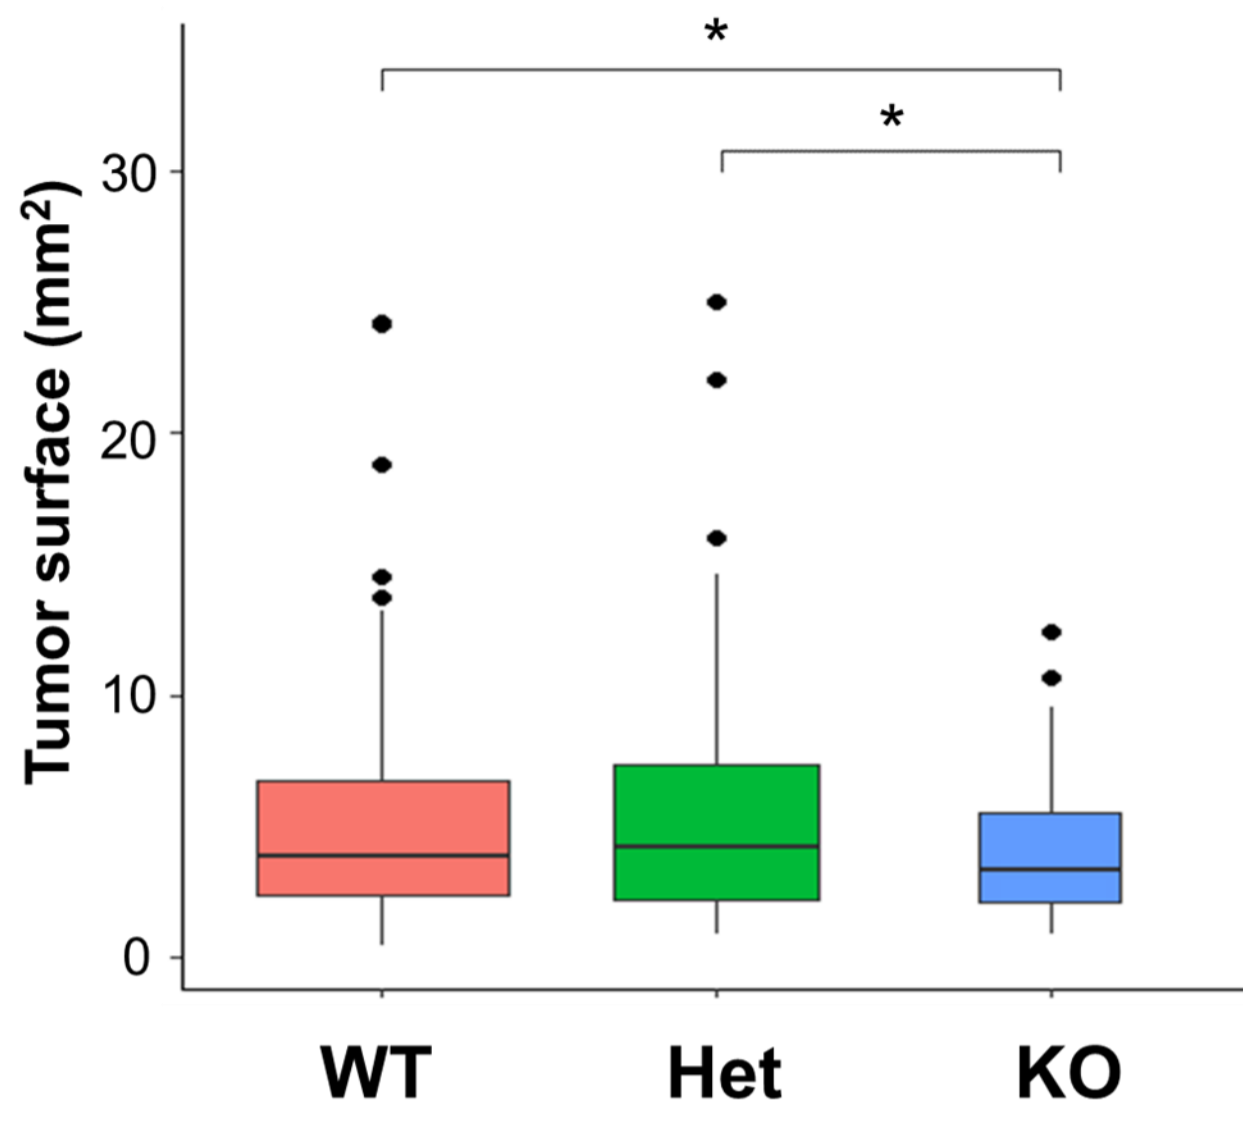

b

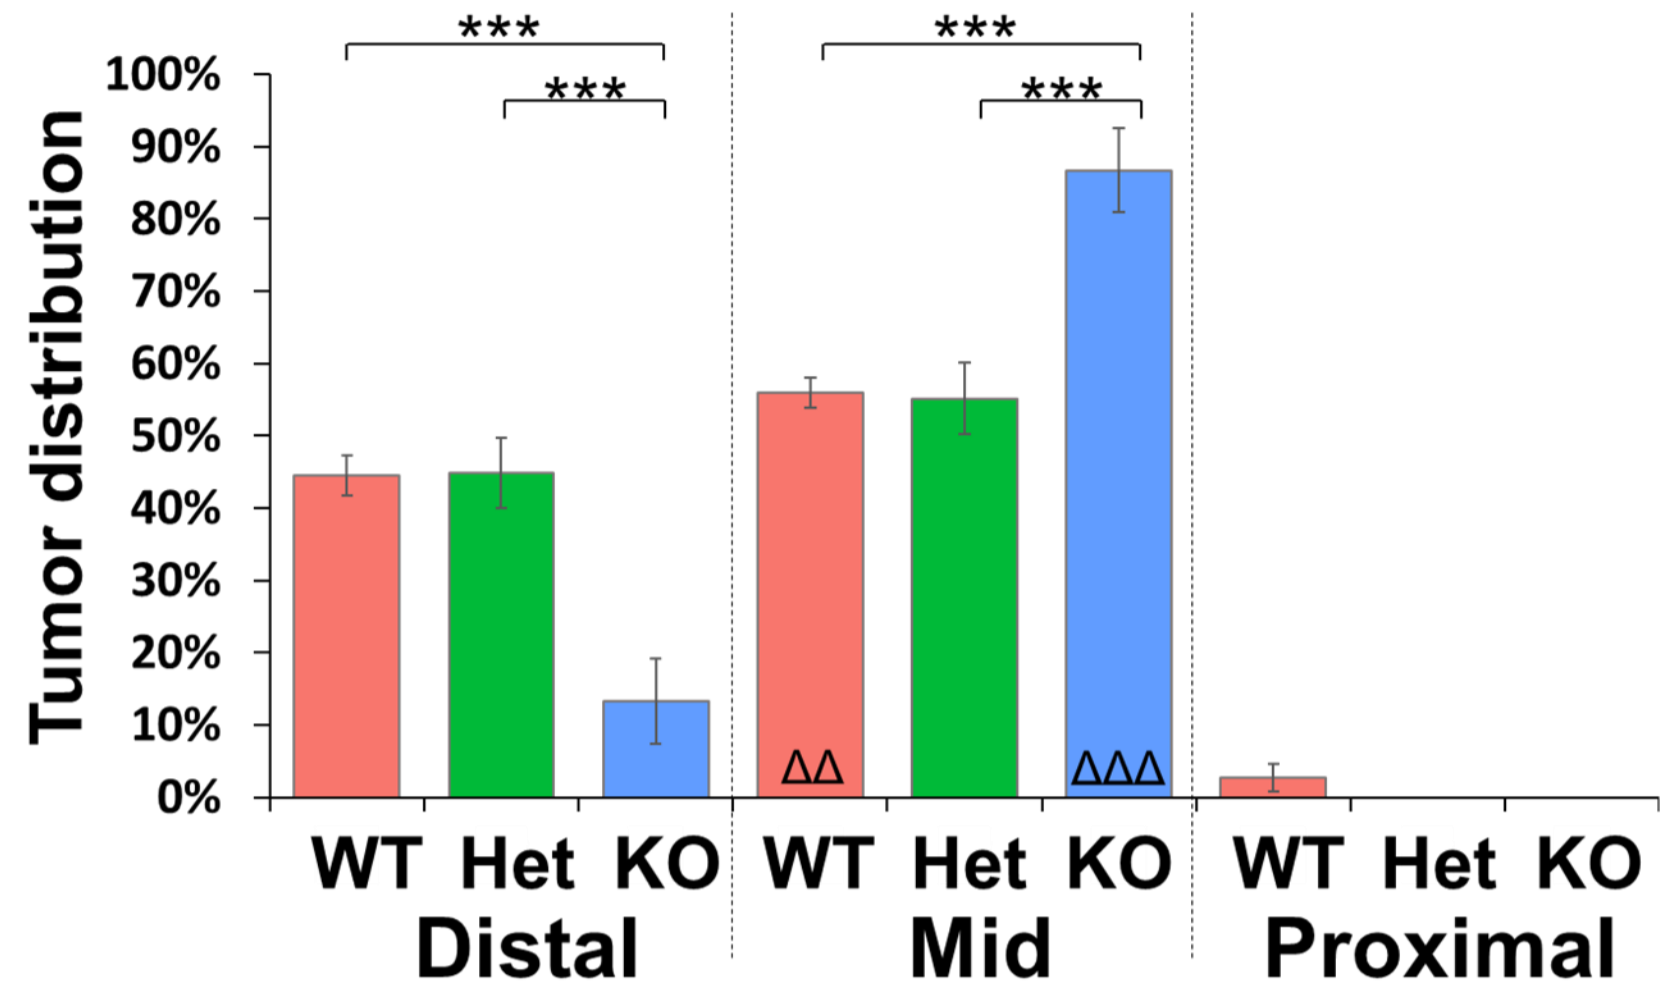

c

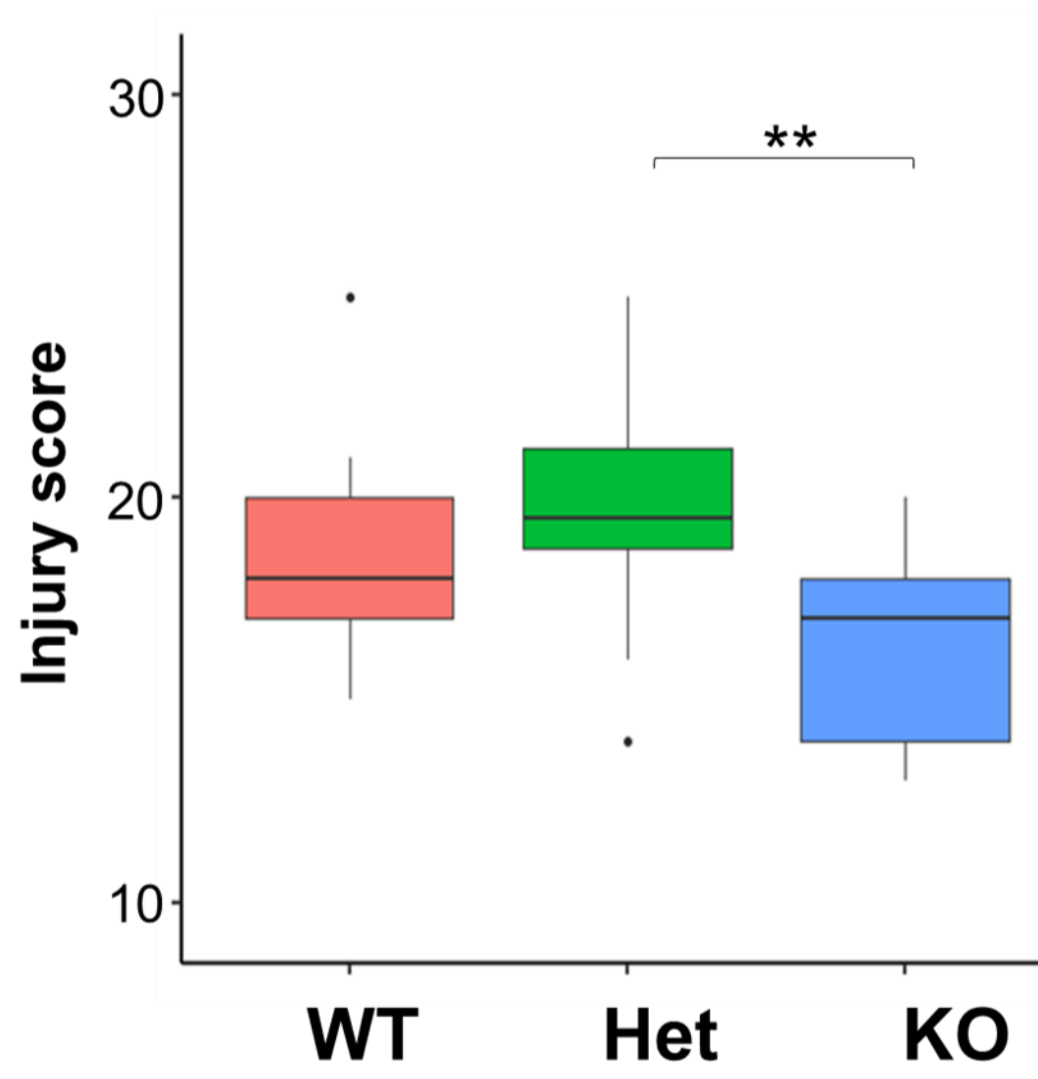

d

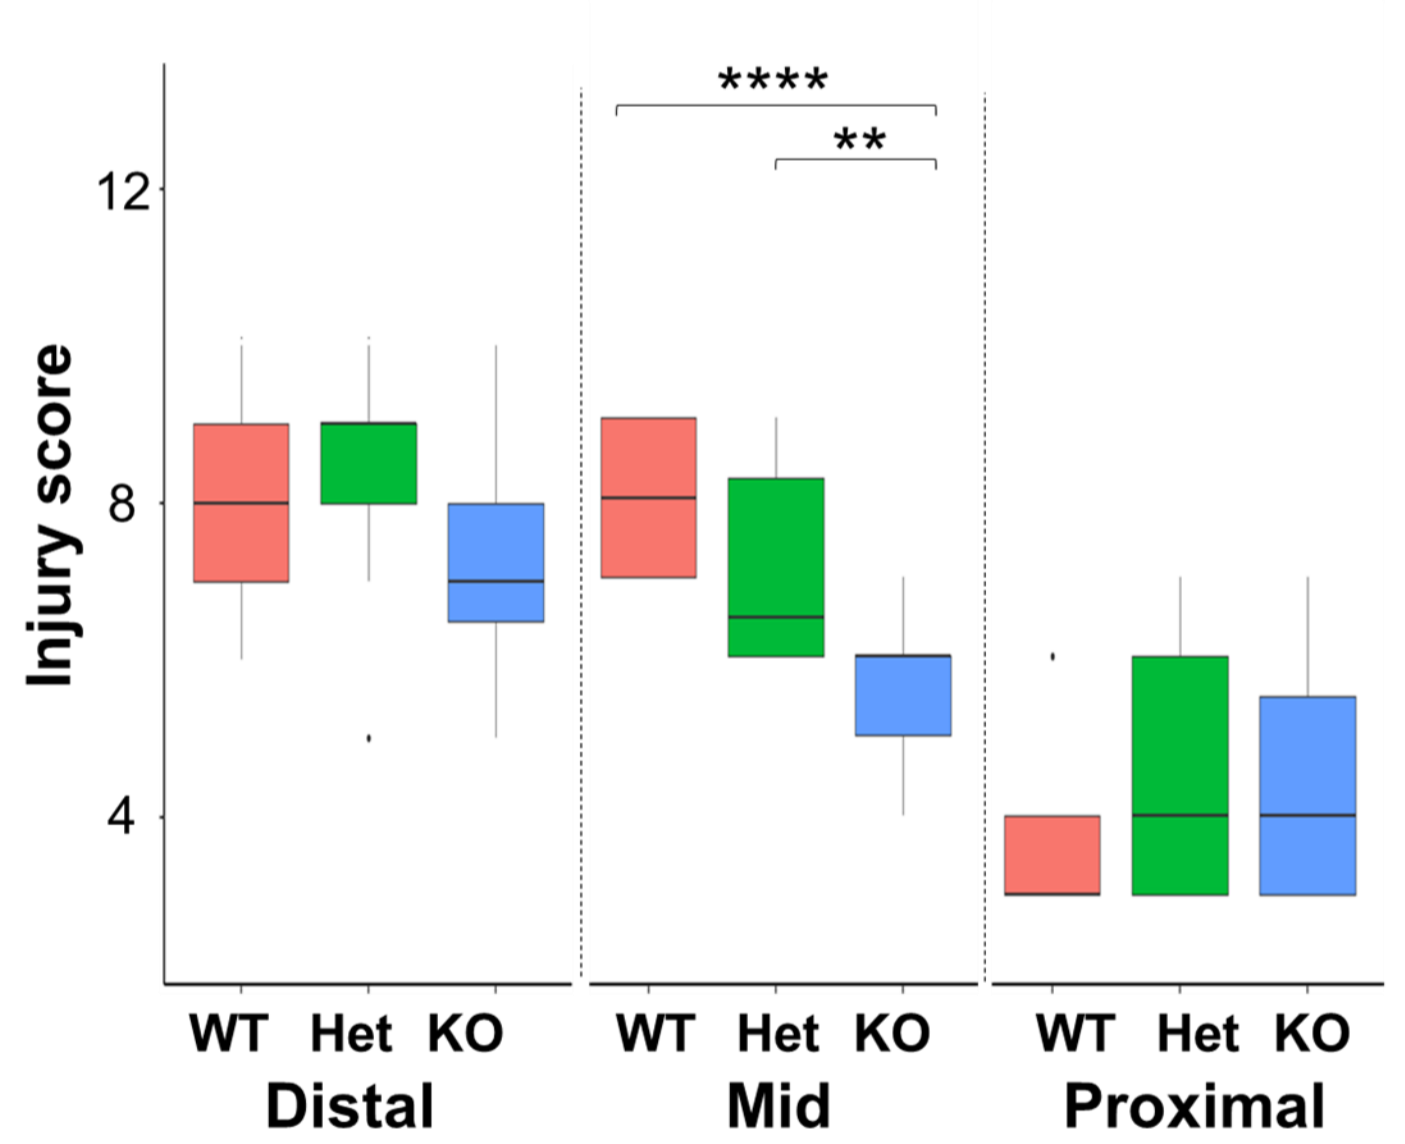

Supp. Figure 2

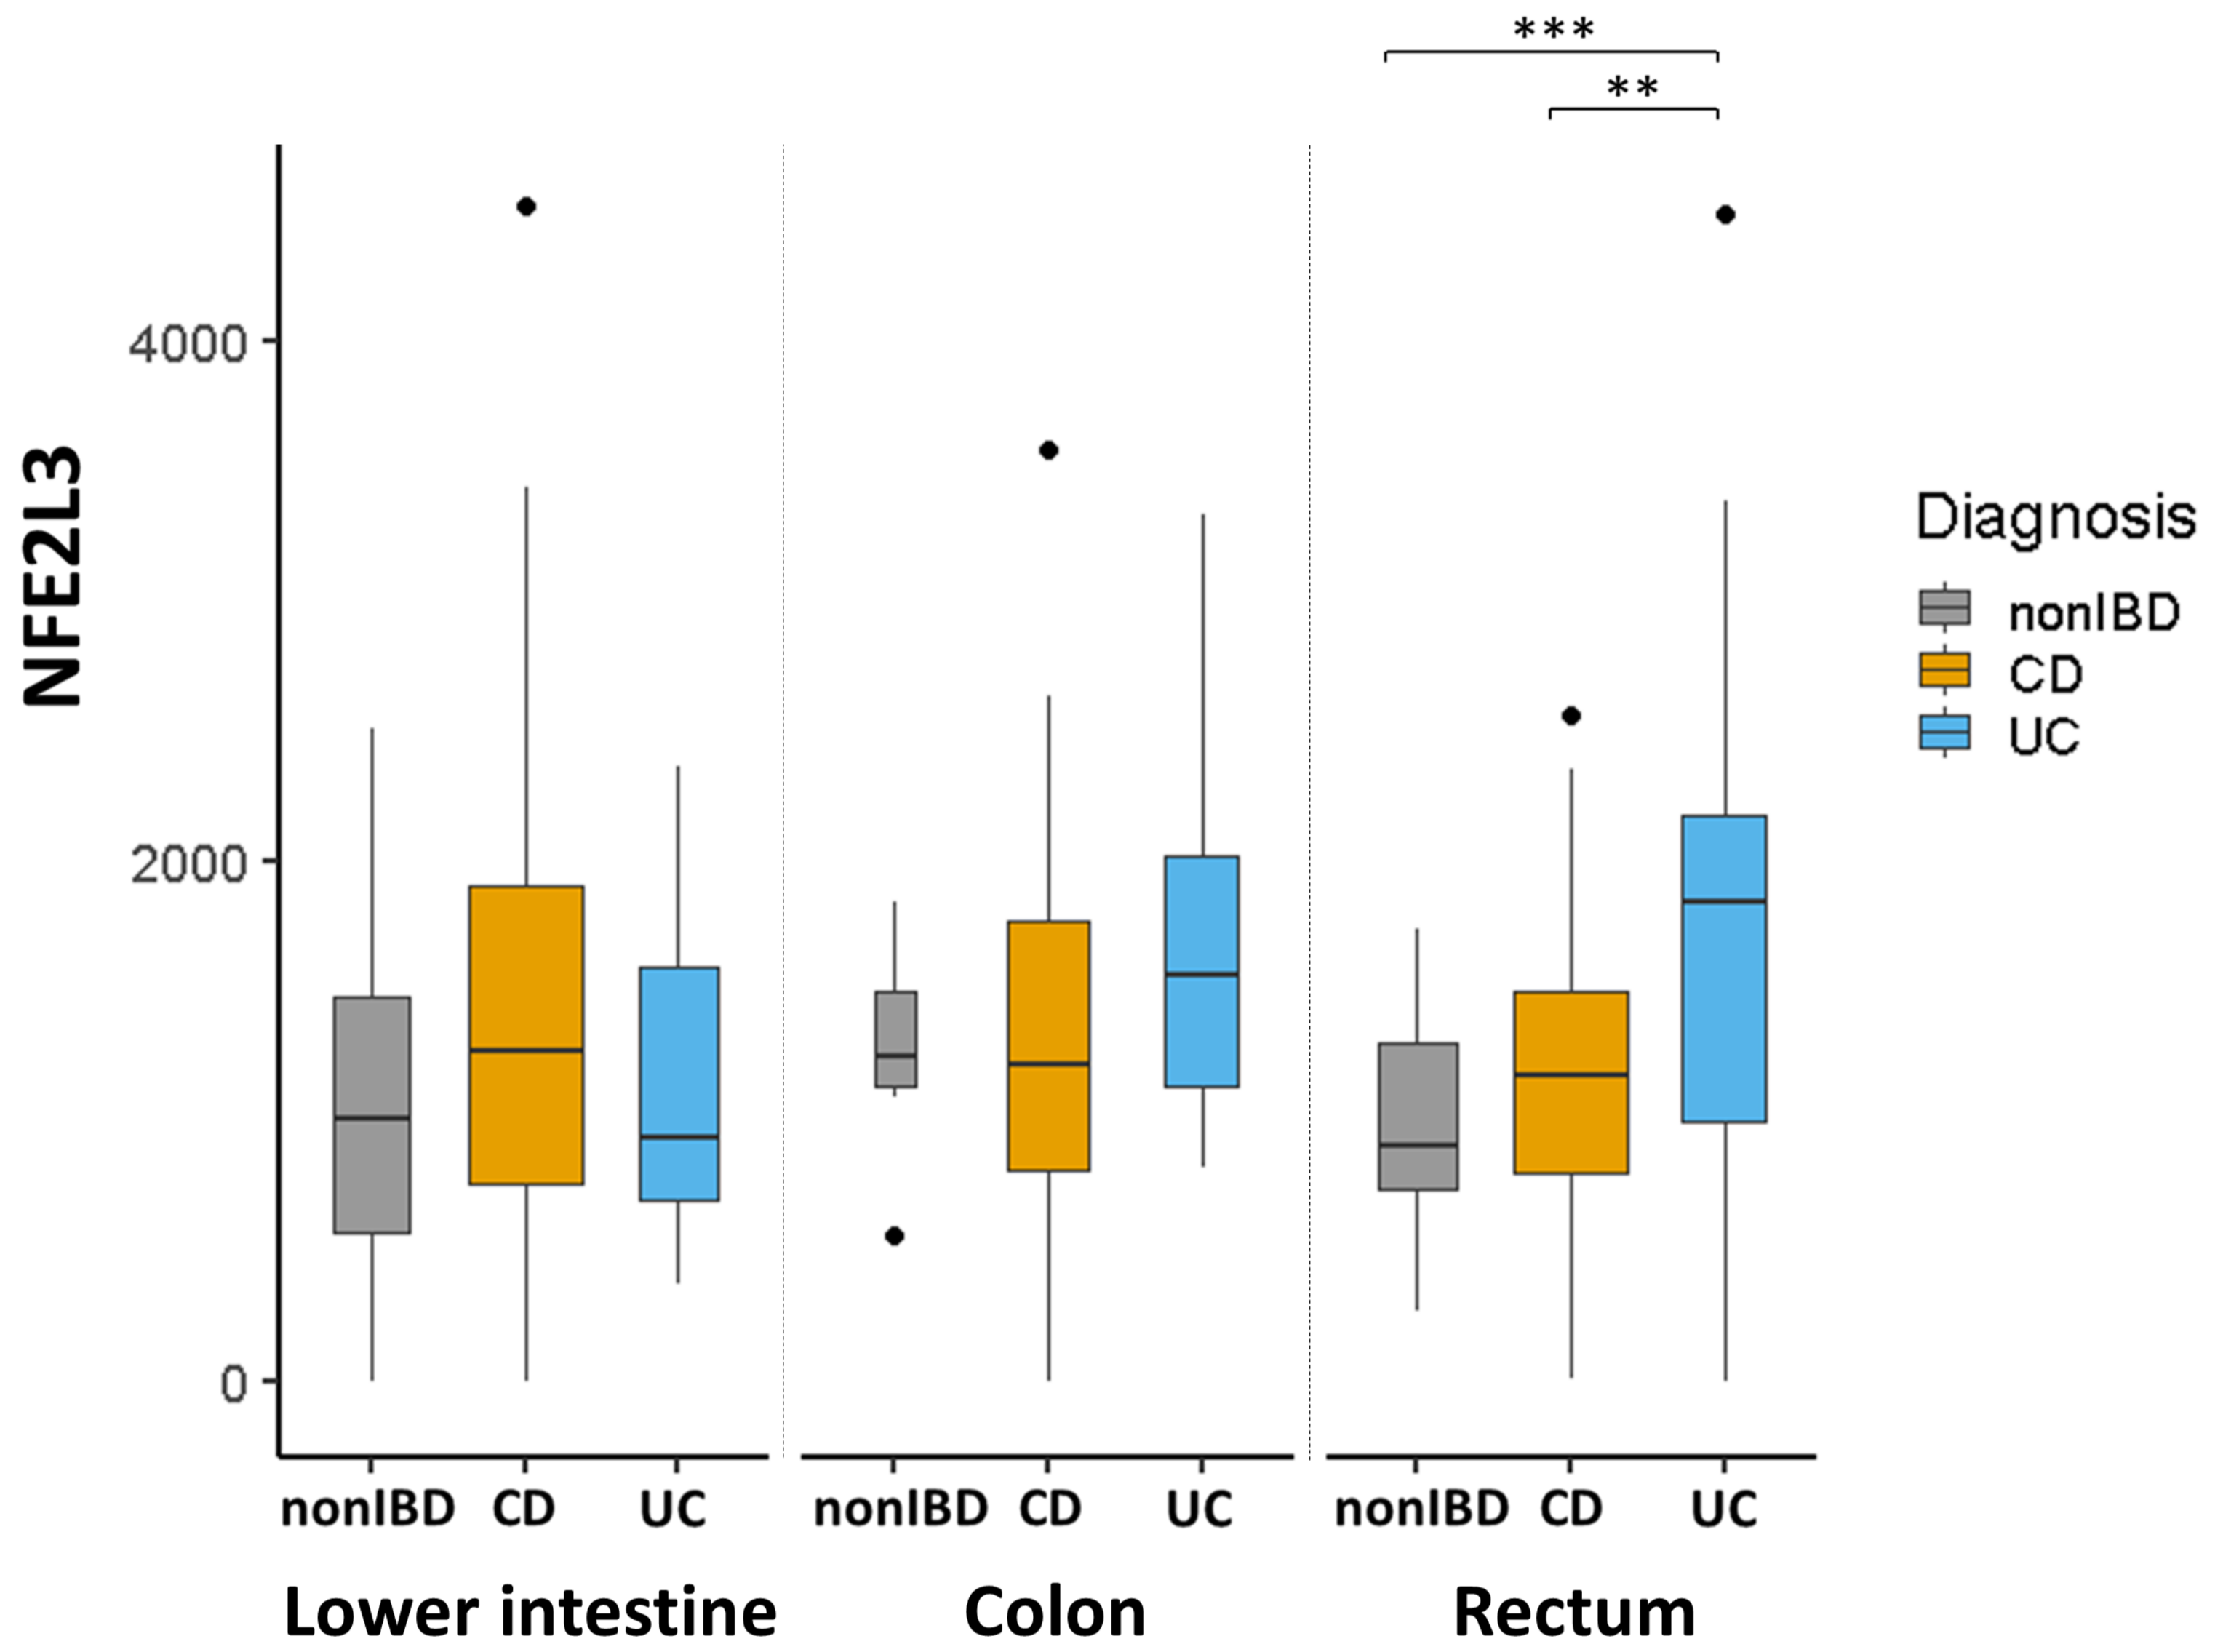

Supplement: 41388_2022_2192_MOESM4_ESM.pdf [file 41388_2022_2192_MOESM4_ESM.pdf]
